# Supplementary material for: Combination of arsenic trioxide and Dasatinib: a new strategy to treat Philadelphia chromosome‐positive acute lymphoblastic leukaemia
Source: PubMed Central journal article supplement (PMC5824394; doi:10.1111/jcmm.13436), 2017-12-20
Supplement: JCMM-22-1614-s001.pdf [file JCMM-22-1614-s001.pdf]

# Combination of Arsenic trioxide and Dasatinib: A New strategy to Treat Philadelphia chromosome positive acute lymphoblastic leukemia

## Supplementary data

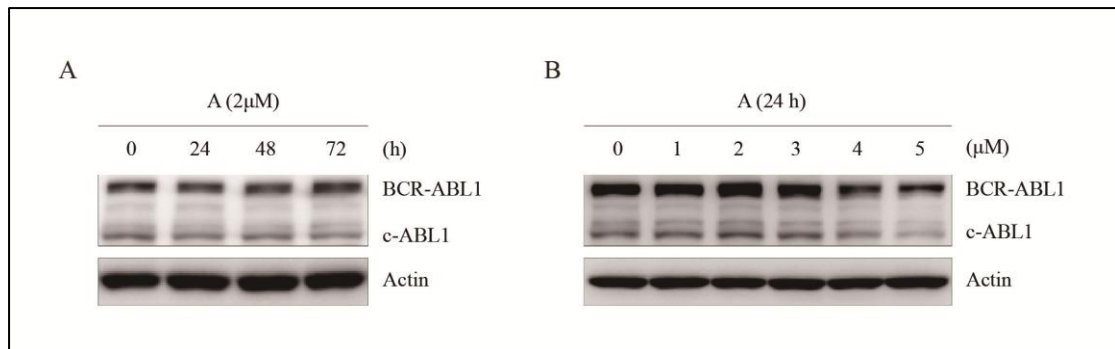

**Fig. S1** Effects of single-agent ATO on BCR-ABL1. **(A)** SUP-B15 cells were treated with ATO for the indicated time courses. **(B)** SUP-B15 cells were treated with the indicated concentrations of ATO for 24 h. The expression of BCR-ABL1 (c-ABL1) was determined by Western blot. A, ATO.

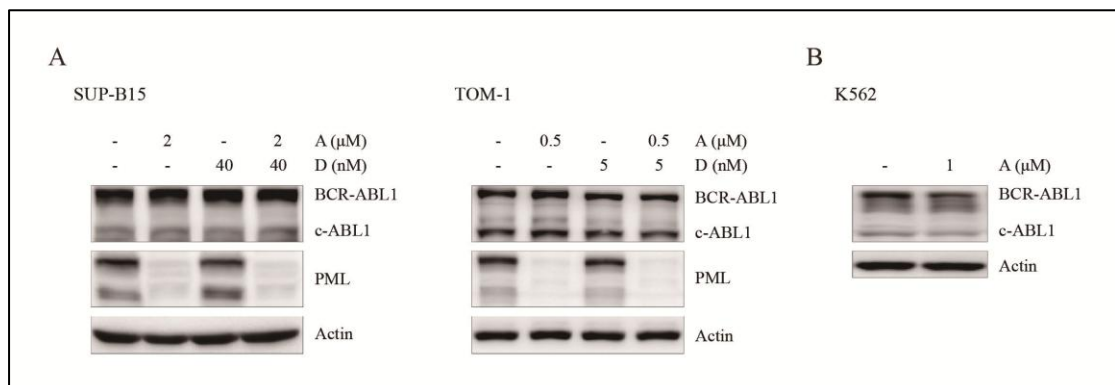

**Fig. S2** Effects of ATO and/or Dasatinib on BCR-ABL1 in SUP-B15, TOM-1 or K562 cell lines. **(A)** SUP-B15 and TOM-1 cells were treated with ATO and/or Dasatinib for 24 h. The expression of BCR-ABL1 (c-ABL1) and PML were determined by Western blot. **(B)** K562 cells were treated with ATO for 24 h. The expression of BCR-ABL1 (c-ABL1) was determined by Western blot. D, Dasatinib.

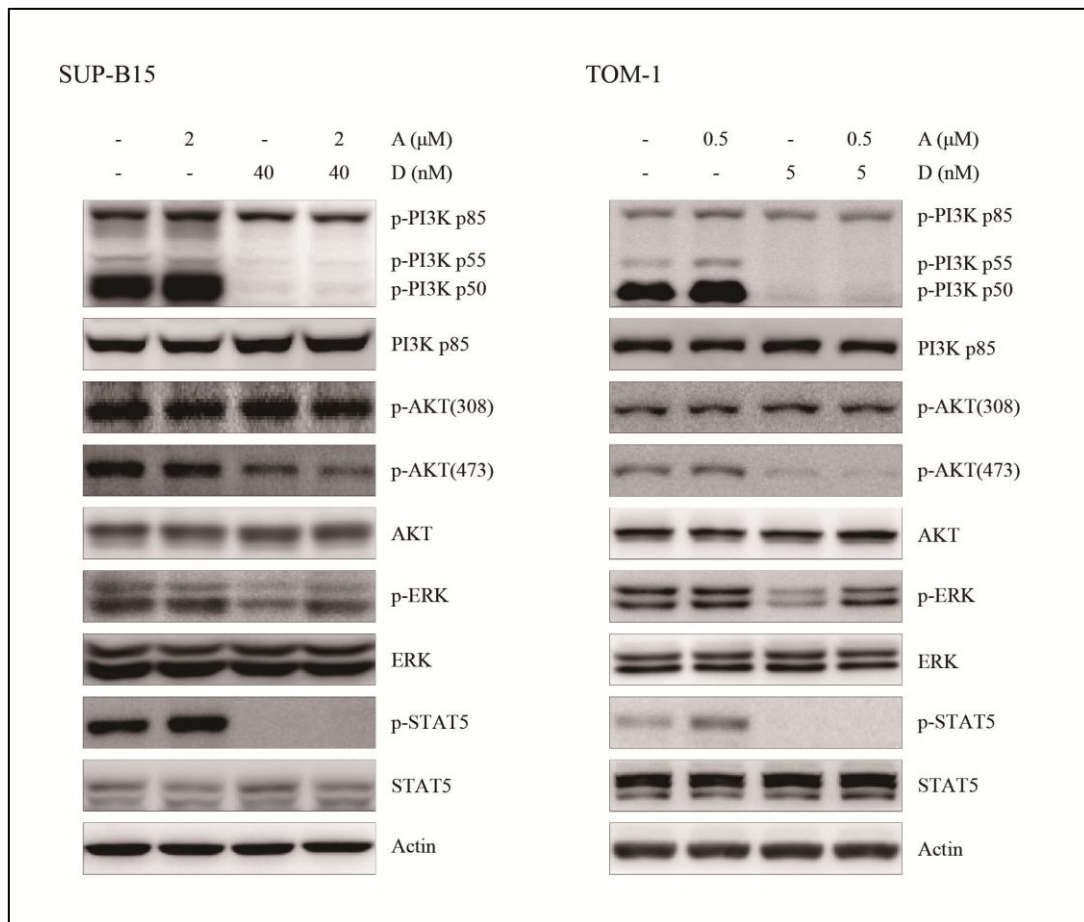

**Fig. S3** Effects of ATO and/or Dasatinib on the three main downstream signaling pathways of BCR-ABL1. Total and phosphorylated STAT5, ERK, PI3K and AKT were determined by Western blot after ATO and/or Dasatinib 24 h treatment.

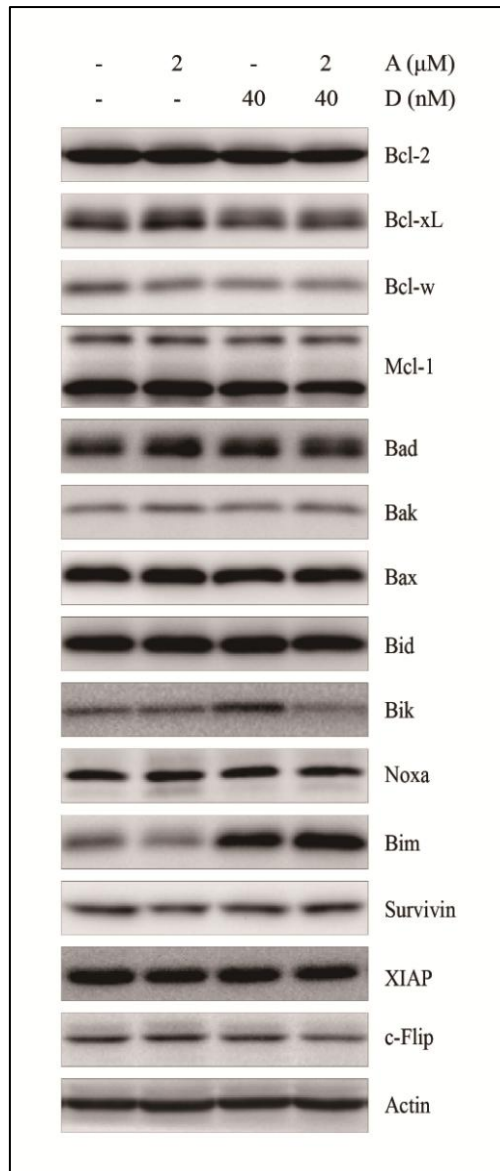

**Fig. S4** The expression of proteins of the BCL-2, IAP and Flip families were detected by Western blots after ATO and/or Dasatinib 24 h treatment in SUP-B15 cells.

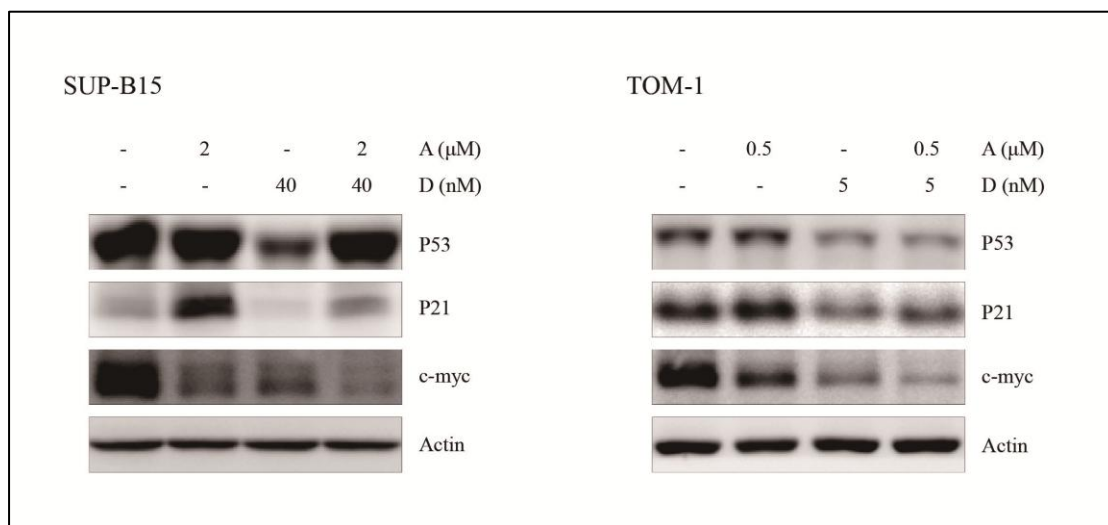

**Fig. S5** p53, p21 and c-myc were detected by Western blot after a 24 h treatment with ATO and/or Dasatinib.

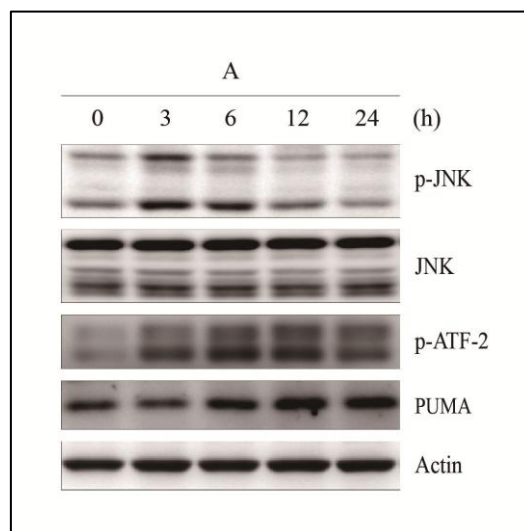

**Fig. S6** JNK, p-JNK, p-ATF-2 and PUMA were detected by Western blot after a treatment with ATO (2  $\mu\text{M}$ ) for the indicated time courses in SUP-B15 cells.

|   |                                                        |                                                    |                                  |                                   |
|---|--------------------------------------------------------|----------------------------------------------------|----------------------------------|-----------------------------------|
| A | Genes negatively associated with prognosis (neg genes) | <b>AK022211</b><br><b>FASTKD1</b><br><b>STARD4</b> | No neg genes expressed           | At least one neg gene expressed   |
|   | GSE34861                                               |                                                    | OR                               | AND                               |
|   | Genes positively associated with prognosis (pos genes) | <b>CAMSAP1</b><br><b>PCGF6</b><br><b>SH3RF3</b>    | At least two pos genes expressed | Less than two pos genes expressed |
|   |                                                        |                                                    | ↓                                | ↓                                 |
|   |                                                        |                                                    | <b>P1&amp;2</b>                  | <b>P3</b>                         |

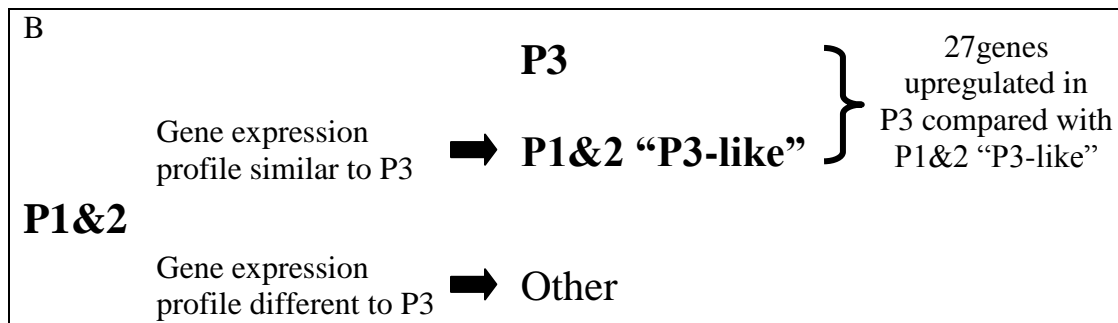

**Fig. S7** Strategy for the identification of 27 genes whose activation would be directly related to the aggressiveness of the ALL. **(A)** Tumors in GSE34861 series were stratified into P1&2 and P3 group as a function of the expression of the six genes. **(B)** 27 genes were identified to be up-regulated in P3 tumors compared with P1&2 “P3-like” group.

**Table S1** The Combination Index (CI) of ATO and Dasatinib in SUP-B15 and TOM-1 cells

|      |  | SUP-B15               |                |        | TOM-1                 |                |        |
|------|--|-----------------------|----------------|--------|-----------------------|----------------|--------|
|      |  | ATO ( $\mu\text{M}$ ) | Dasatinib (nM) | CI     | ATO ( $\mu\text{M}$ ) | Dasatinib (nM) | CI     |
| 36 h |  | 1.0                   | 20.0           | 0.8189 | 0.5                   | 5.0            | 0.1823 |
|      |  | 1.0                   | 40.0           | 0.8583 | 0.5                   | 10.0           | 0.1734 |
|      |  | 1.0                   | 60.0           | 0.8551 | 0.5                   | 15.0           | 0.1694 |
|      |  | 1.0                   | 80.0           | 0.8959 | 0.5                   | 20.0           | 0.1649 |
|      |  | 2.0                   | 20.0           | 0.6328 | 1.0                   | 5.0            | 0.2369 |
|      |  | 2.0                   | 40.0           | 0.5979 | 1.0                   | 10.0           | 0.2396 |
|      |  | 2.0                   | 60.0           | 0.5770 | 1.0                   | 15.0           | 0.2278 |
|      |  | 2.0                   | 80.0           | 0.5607 | 1.0                   | 20.0           | 0.2298 |
| 48 h |  | 1.0                   | 20.0           | 0.4834 | 0.5                   | 5.0            | 0.0016 |
|      |  | 1.0                   | 40.0           | 0.5152 | 0.5                   | 10.0           | 0.0012 |
|      |  | 1.0                   | 60.0           | 0.4637 | 0.5                   | 15.0           | 0.0011 |
|      |  | 1.0                   | 80.0           | 0.4425 | 0.5                   | 20.0           | 0.0011 |
|      |  | 2.0                   | 20.0           | 0.3253 | 1.0                   | 5.0            | 0.0007 |
|      |  | 2.0                   | 40.0           | 0.2694 | 1.0                   | 10.0           | 0.0004 |
|      |  | 2.0                   | 60.0           | 0.1942 | 1.0                   | 15.0           | 0.0004 |
|      |  | 2.0                   | 80.0           | 0.1649 | 1.0                   | 20.0           | 0.0005 |

**Table S2** Genes up-regulated in P3 vs P1&2 “P3-like”

---

| <b>Gene_Symbol</b> |
|--------------------|
| PARP8              |
| FAM150B            |
| CDK6               |
| ETV6               |
| PTEN               |
| PLD1               |
| MIR155HG           |
| MLF1IP             |
| STARD4             |
| AGPS               |
| CXXC5              |
| ATAD2              |
| LOC100506935       |
| ARPP19             |
| TAPT1              |
| SENP6              |
| SC4MOL             |
| CTGF               |
| DPYD               |
| NFIL3              |
| RGS1               |
| TMED5              |
| ACSL1              |
| IGFBP7             |
| DSTN               |
| FAM91A2            |
| SYTL3              |

---
